# Supplementary material
Source: PubMed Central journal article supplement (PMC6478541)
Supplement: NIHMS1522556-supplement-1.pdf [file NIHMS1522556-supplement-1.pdf]

| Gene          | Forward Primer           | Reverse Primer         |
|---------------|--------------------------|------------------------|
| <i>Gapdh</i>  | CAATGACCCCTTCATTGACC     | GATCTCGCTCCTGGAAGATG   |
| <i>Hprt</i>   | AGCTACTGTAATGATCAGTCAACG | AGAGGTCCTTTTCACCAGCA   |
| <i>Ccnd2</i>  | CGCTACCGACTTCAAGTTTGC    | TCATCATCCTGCTGAAGCCC   |
| <i>Eef1e1</i> | GCGGCAGATTCCAGTTCTACAG   | ACTAGATGGGTGGCGATGGT   |
| <i>Pno1</i>   | TGCACGTTACATTCTTGGC      | TGGAGGATTCCTAGGATGAGG  |
| <i>Gbp2</i>   | AGCTGCACTATGTGACGGAG     | TAGCGGAATCGTCTACCCCA   |
| <i>Clqbp</i>  | CCCTTCGGTTTGCTCAGCG      | TTGTCTCCTTCCGTGTGCAGAG |
| <i>Srm</i>    | GTGGTGGACTACGCCTACTG     | TGGTGCTCGGGTTTTTGCTA   |
| <i>Tfrc</i>   | CCTTCGCAGGCCAGTGCTA      | ACAAGGGAGTACCCCGACA    |
| <i>Ppal</i>   | CCCTCAGACATGGGAAGACC     | TCGATTGGGTTCGTTGTCACC  |
| <i>Ezh2</i>   | TCCATGCAACACCCAACACAT    | CTCCCTCCAGATGCTGGTAAC  |

**Supplementary Table 1. Primers for Quantitative PCR analysis of TCR regulated genes.**
